# Supplementary material
Source: PubMed Central journal article supplement (PMC3094076)

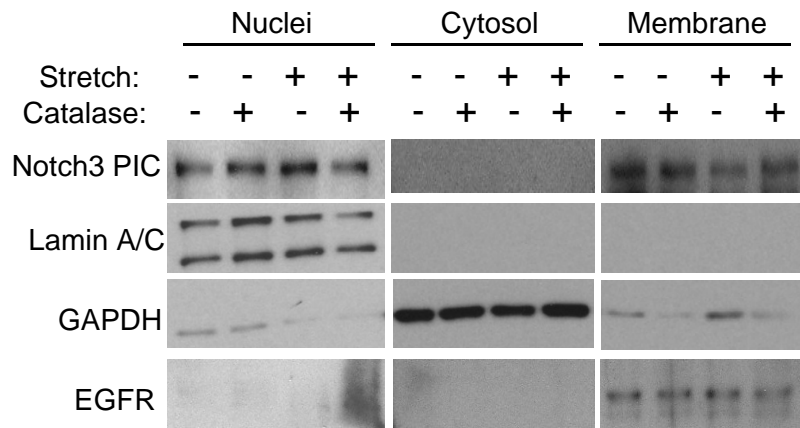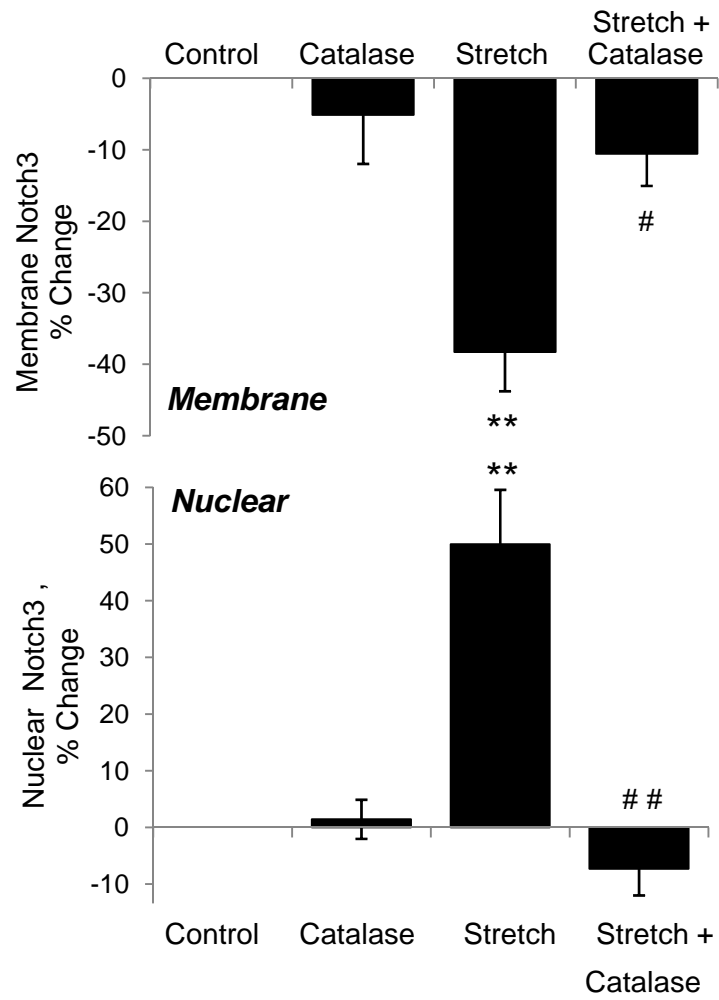

Figure 9

Supplement: supp_00535.2010_revised_figure_9.pdf [file supp_00535.2010_revised_figure_9.pdf]
